# Supplementary material
Source: PubMed Central journal article supplement (PMC3958935)
Supplement: NIHMS554330-supplement-supplement_1.pdf [file NIHMS554330-supplement-supplement_1.pdf]

**Supplementary Table.** Random effects solutions for network-level intercepts of U.S. dialysis facility-level lack of pre-end-stage renal disease care (negative estimate = *greater* receipt of pre-end stage renal disease care in the network, relative to the overall United States)

| Network | U.S. States            | A. Main Analysis* |                  | B. Sensitivity Analysis* |                  | C. Sensitivity Analysis* |                  |
|---------|------------------------|-------------------|------------------|--------------------------|------------------|--------------------------|------------------|
|         |                        | Estimate          | P                | Estimate                 | P                | Estimate                 | P                |
| 1       | CT, ME, MA, NH, RI, VT | <b>-5.42</b>      | <b>0.001</b>     | <b>-5.29</b>             | <b>&lt;0.001</b> | <b>-0.65</b>             | <b>&lt;.0001</b> |
| 2       | NY                     | 2.53              | 0.086            | 2.85                     | 0.051            | 0.16                     | 0.256            |
| 3       | NJ**                   | 3.10              | 0.074            | <b>3.58</b>              | <b>0.038</b>     | 0.25                     | 0.141            |
| 4       | DE, PA                 | -2.45             | 0.081            | -2.49                    | 0.074            | <b>-0.40</b>             | <b>0.005</b>     |
| 5       | DC, MD, VA, WV         | -0.11             | 0.938            | 0.09                     | 0.947            | -0.06                    | 0.628            |
| 6       | GA, NC, SC             | <b>-5.44</b>      | <b>&lt;0.001</b> | <b>-5.74</b>             | <b>&lt;.0001</b> | <b>-0.26</b>             | <b>0.026</b>     |
| 7       | FL                     | -0.09             | 0.944            | -0.07                    | 0.954            | 0.02                     | 0.874            |
| 8       | AL, MS, TN             | 1.08              | 0.410            | 0.95                     | 0.461            | <b>0.28</b>              | <b>0.029</b>     |
| 9       | IN, KY, OH             | -2.02             | 0.086            | -2.23                    | 0.058            | -0.17                    | 0.159            |
| 10      | IL                     | 0.93              | 0.524            | 1.36                     | 0.352            | 0.19                     | 0.192            |
| 11      | MI, MN, ND, SD, WI     | 0.34              | 0.783            | 0.36                     | 0.769            | 0.02                     | 0.851            |
| 12      | IA, KS, MO, NE         | <b>3.27</b>       | <b>0.020</b>     | <b>3.24</b>              | <b>0.020</b>     | 0.17                     | 0.217            |
| 13      | AR, LA, OK             | <b>5.62</b>       | <b>&lt;0.001</b> | <b>5.15</b>              | <b>&lt;0.001</b> | <b>0.49</b>              | <b>&lt;0.001</b> |
| 14      | TX                     | 1.29              | 0.281            | 1.21                     | 0.314            | <b>0.38</b>              | <b>0.001</b>     |
| 15      | AZ, CO, NM, NV, UT, WY | 1.11              | 0.407            | 1.06                     | 0.436            | 0.13                     | 0.336            |
| 16      | AK, ID, MT, OR, WA     | 0.13              | 0.934            | 0.01                     | 0.996            | 0.04                     | 0.812            |
| 17      | HI, N. CA              | -1.76             | 0.225            | -1.79                    | 0.222            | -0.27                    | 0.066            |
| 18      | S. CA                  | -2.13             | 0.107            | -2.25                    | 0.090            | <b>-0.32</b>             | <b>0.018</b>     |

Estimates represent network-level changes in absolute percentage (A, B) or log odds (C) of dialysis facility-level percentage of patients with no pre-end-stage renal disease care, relative to the overall baseline. Boldface type = statistically significant.

\*Analyses are as in Table 2.

\*\*This network also includes Puerto Rico and the Virgin Islands but these facilities were excluded from this analysis.

**Supplementary Figure.** Crude association of dialysis facility neighborhood poverty with lack of pre-ESRD care in U.S. dialysis facilities. FPT, federal poverty threshold.

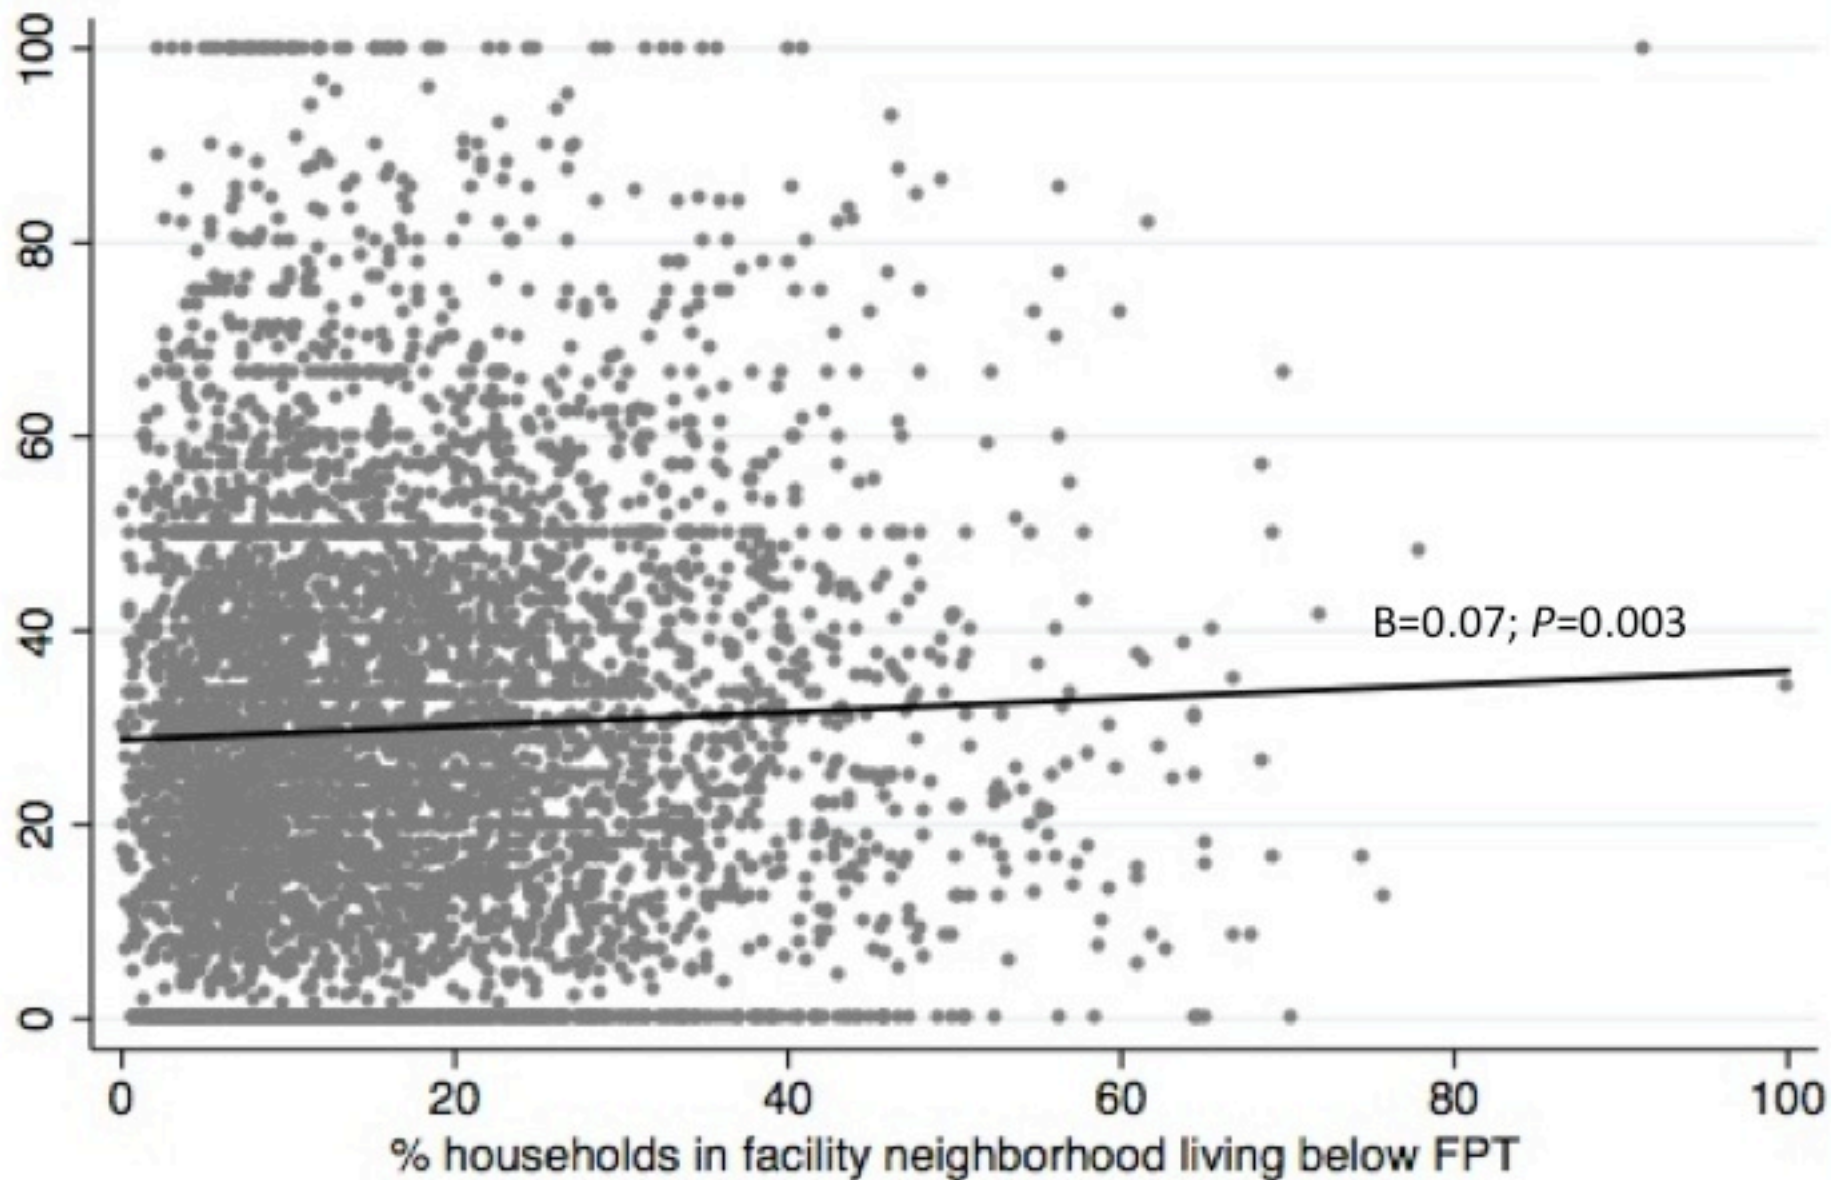

• % of patients at facility with no pre-ESRD care      — Fitted values
